# Supplementary material for: Risk Factors for Non-Communicable Diseases at Baseline and Their Short-Term Changes in a Workplace Cohort in Singapore
Source: Int J Environ Res Public Health. 2019 Nov 18;16(22):4551. doi: 10.3390/ijerph16224551 (PMC6888317; doi:10.3390/ijerph16224551)
Supplement: Supplementary file 1 [file ijerph-16-04551-s001.pdf]

## Supplementary file

**Table S1.** Baseline characteristics of participants followed-up versus lost to follow-up.

|                                                | Followed-up<br>(N=334) | Lost to follow-up<br>(N=130) | P<br>value |
|------------------------------------------------|------------------------|------------------------------|------------|
| Age (years)                                    | 39.8(11.1)             | 37.0 (11.9)                  | 0.016      |
| Male                                           | 261 (78.1)             | 108 (83.1)                   | 0.24       |
| Education                                      |                        |                              |            |
| Up to Post-Secondary                           | 81 (24.3)              | 35 (26.9)                    | 0.84       |
| Diploma and Professional Qualification         | 133 (39.8)             | 50 (38.5)                    |            |
| Degree                                         | 120 (35.9)             | 45 (34.6)                    |            |
| Ethnicity                                      |                        |                              |            |
| Chinese                                        | 219 (65.6)             | 77 (59.2)                    | 0.032      |
| Malay                                          | 61 (18.3)              | 38 (29.2)                    |            |
| Indian                                         | 42 (12.6)              | 9 (6.9)                      |            |
| Others <sup>a</sup>                            | 12 (3.6)               | 6 (4.6)                      |            |
| Marital status                                 |                        |                              |            |
| Single <sup>b</sup>                            | 126 (37.7)             | 58 (44.6)                    | 0.17       |
| Married                                        | 208 (62.3)             | 72 (55.4)                    |            |
| Monthly income                                 |                        |                              |            |
| < S\$ 4000                                     | 237 (71.0)             | 94 (72.3)                    | 0.77       |
| ≥ S\$ 4000                                     | 97 (29.0)              | 36 (27.7)                    |            |
| Years employed in the current company          | 4.0 (1.0–8.0)          | 1.5 (0.6–4.0)                | < 0.001    |
| Job type                                       |                        |                              |            |
| Control room staff                             | 160 (47.9)             | 65 (50.0)                    | 0.79       |
| Office staff                                   | 100 (29.9)             | 40 (30.8)                    |            |
| Workshop staff                                 | 74 (22.2)              | 25 (19.2)                    |            |
| Work hours/week                                | 43.1 (6.8)             | 42.2 (5.2)                   | 0.16       |
| Shift work (yes)                               | 221 (66.2)             | 77 (59.2)                    | 0.16       |
| Current smoking (yes)                          | 72 (21.6)              | 41 (31.5)                    | 0.024      |
| Alcohol use (last 12 months) (yes)             | 180 (53.9)             | 68 (52.3)                    | 0.76       |
| Standard drinks of alcohol (on a drinking day) | 1 (0–2)                | 1 (0–2)                      | 0.87       |
| Physically active <sup>c</sup>                 | 258 (77.3)             | 99 (76.2)                    | 0.8        |
| Sitting/reclining time (hours/day)             | 6.7 (3.6)              | 6.8 (3.9)                    | 0.77       |
| AHEI score                                     | 25.0 (8.5)             | 24.1 (8.6)                   | 0.33       |
| ≥ 5 servings of fruit and vegetables/day       | 115 (34.4)             | 43 (33.1)                    | 0.78       |
| Weight (kg)                                    | 72.5 (17.3)            | 73.7 (16.8)                  | 0.47       |
| Body mass index (kg/m <sup>2</sup> )           | 25.6 (5.3)             | 25.6 (5.1)                   | 0.97       |
| Overweight or obese <sup>d</sup>               | 219 (65.6)             | 92 (70.8)                    | 0.29       |
| Waist-to-hip ratio                             | 0.87 (0.07)            | 0.86 (0.07)                  | 0.67       |
| Central obesity <sup>e</sup>                   | 118 (35.3)             | 42 (32.3)                    | 0.54       |

AHEI, Alternative Healthy Eating Index. Data are mean (standard deviation) or median (inter-quartile range) for continuous variables, and frequency and percentage for categorical variables. <sup>a</sup>Includes mixed ethnicities, Indonesians, Pakistanis and Filipinos. <sup>b</sup>Includes never married, widowed, divorced and separated. <sup>c</sup>Active were those doing at least 150 min of moderate physical activity per week or at least 75 min of vigorous physical activity per week. <sup>d</sup>Body mass index ≥23 kg/m<sup>2</sup>. <sup>e</sup>Waist-to-hip ratio ≥0.90 in men and ≥0.85 in women.
